# Supplementary material for: High-performance hierarchical ultrathin sheet-based CoOOH hollow nanospheres with rich oxygen vacancies for the oxygen evolution reaction
Source: Royal Society of Chemistry journal article supplement (doi:10.1039/c9ta00878k), 2019-01-01
Supplement: c9ta00878k1.pdf [file c9ta00878k1.pdf]

## Electronic Supplementary Material

### **High-Performance Hierarchical Ultrathin Sheet-Based CoOOH Hollow Nanospheres with Rich Oxygen Vacancies for Oxygen Evolution Reaction**

Huan Wang,<sup>‡</sup> Er-ming Feng,<sup>‡</sup> Yan-ming Liu, and Chun-yang Zhang<sup>\*</sup>

College of Chemistry, Chemical Engineering and Materials Science, Collaborative Innovation Center of Functionalized Probes for Chemical Imaging in Universities of Shandong, Key Laboratory of Molecular and Nano Probes, Ministry of Education, Shandong Provincial Key Laboratory of Clean Production of Fine Chemicals, Shandong Normal University, Jinan 250014, China.

<sup>‡</sup> These authors contributed equally to this work.

<sup>\*</sup> E-mail: cyzhang@sdu.edu.cn

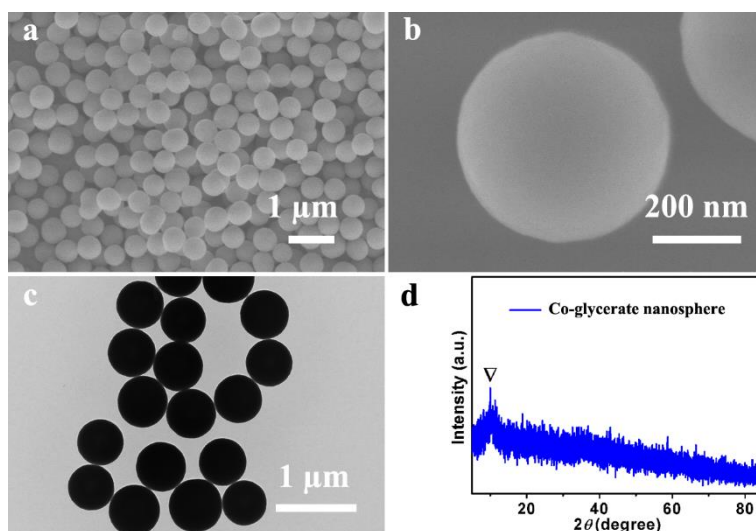

**Fig. S1** (a, b) SEM images, (c) TEM image and (d) XRD pattern of the Co-glycerate nanospheres.

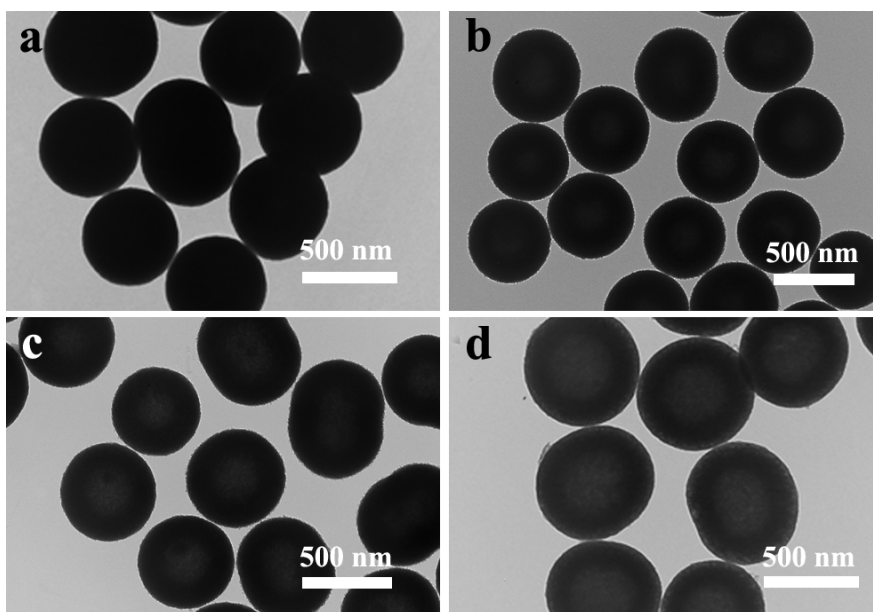

**Fig. S2** TEM images of the intermediates collected at different reaction time during the transformation from the Co-glycerate solid nanospheres to the Pi-Co-glycerate hollow nanosphere: (a) 0 h, (b) 6 h, (c) 24 h, and (d) 72 h.

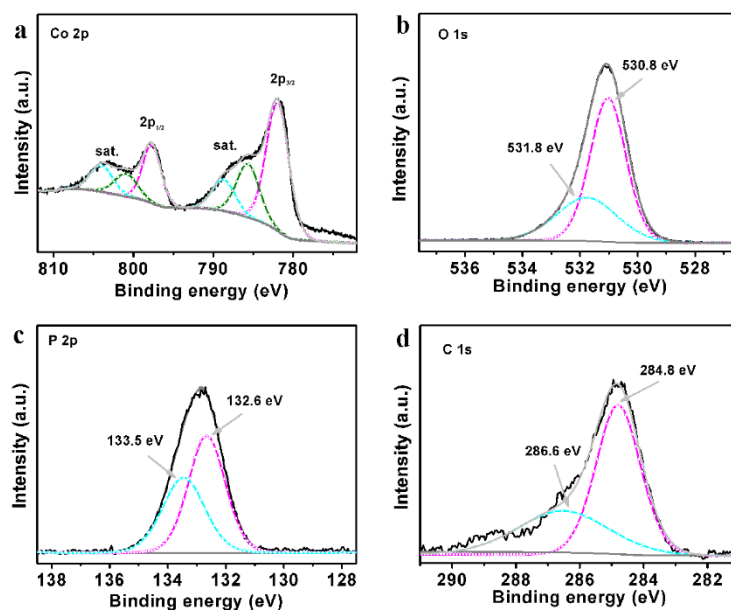

**Fig. S3** Co 2p (a), O 1s (b), P 2p (c) and C 1s (d) XPS spectra of the Pi-Co-glycerate hollow nanospheres. The Co 2p spectra exhibits two main peaks at 797.8 and 781.9 eV, which are ascribed to Co 2p<sub>1/2</sub> and Co 2p<sub>3/2</sub>, respectively. The binding energy of two shakeup satellites (identified as “Sat.”) at 789 and 804 eV are corresponding to Co with oxidation states (Co<sup>2+</sup>).<sup>1</sup> The peak of O 1s can be deconvoluted into two peaks, with one peak at 530.8 eV for the O atom in H<sub>2</sub>PO<sub>2</sub><sup>-</sup> group<sup>2</sup> and the other peak at 531.8 eV for the O-H group<sup>3</sup>. The peak of P 2p can be deconvoluted into two peaks, with the peak at 132.6 eV for the P-H group<sup>4</sup> and the peak at 133.5 eV for the P-O binding. The C1s peak can be deconvoluted into two peaks (284.8 and 286.6 eV), corresponding to carbon atom in C-C binding and C-O binding. These results confirms that the inorganic-organic hybrid Pi-Co-glycerate hollow nanospheres are successfully fabricated.

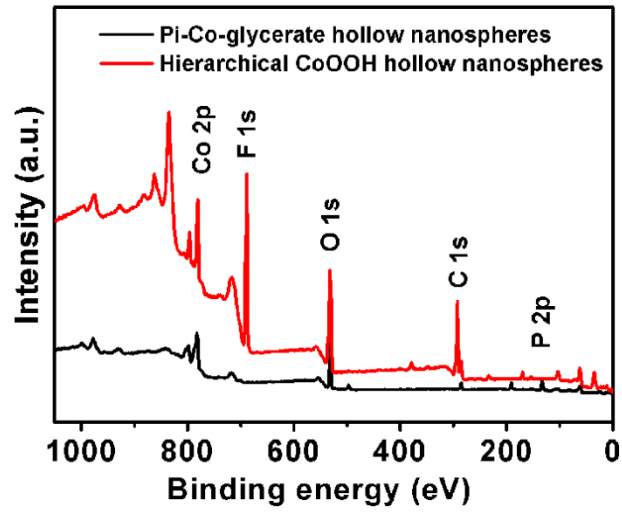

**Fig. S4** XPS survey spectra of the Pi-Co-glycerate hollow nanospheres and the hierarchical CoOOH hollow nanospheres.

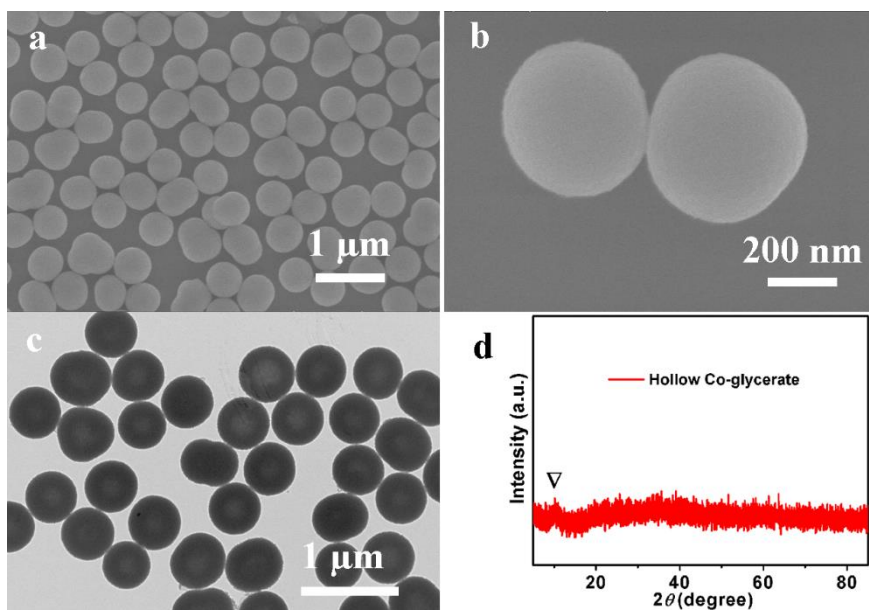

**Fig. S5** SEM images (a and b), TEM image (c) and XRD pattern (d) of the Co-glycerate hollow nanospheres obtained by using similar synthesis approach of the Pi-Co-glycerate except for  $\text{NaH}_2\text{PO}_2$ . The SEM images reveal that the obtained samples are nanospheres (Figure S5a-b), but the TEM image show that they are hollow (Figure S5c). The diffraction peak at  $11^\circ$  suggests the hollow nanospheres are Co-glycerate (Figure S5d).<sup>5</sup> These results confirm that the hollow in the center of Co-glycerate is formed via high temperature-mediated component dissolution.

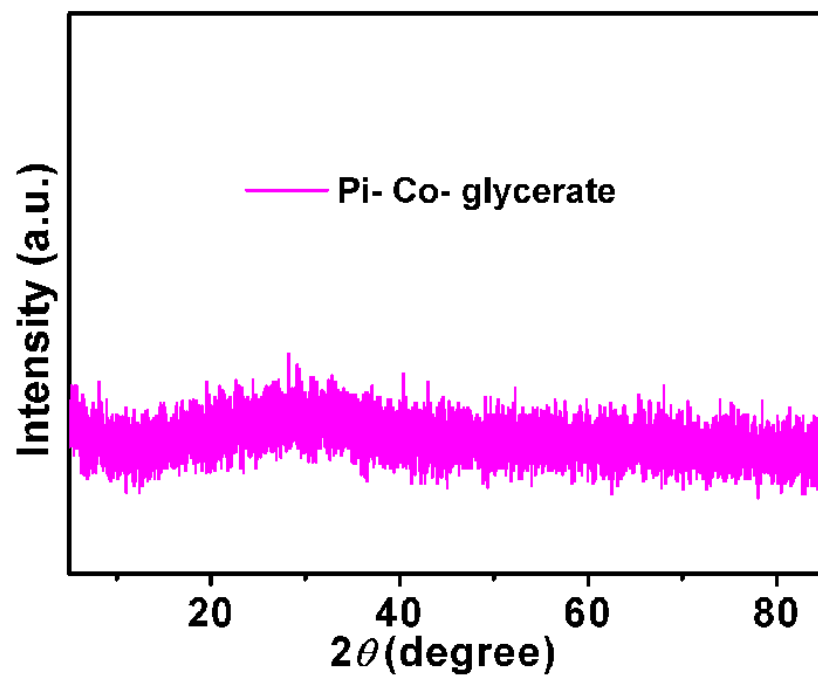

Fig. S6 XRD pattern of the Pi-Co-glycerate hollow nanospheres

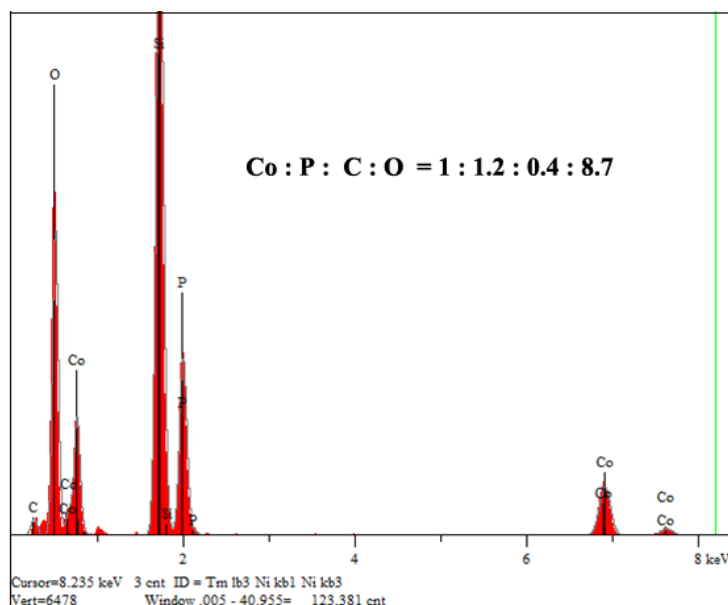

**Fig. S7** EDS image of the Pi-Co-glycerate hollow nanospheres. There are four elements (i.e., C, O, P, and Co) in the Pi-Co-glycerate hollow nanospheres. The molar rate of Co, P, C and O is 1 : 1.2 : 0.4 : 8.7. The molecular formula of the Pi-Co-glycerate hollow nanosphere is  $\text{Co}_3(\text{H}_2\text{PO}_2)_{3.6}(\text{C}_3\text{H}_6\text{O}_3)_{0.4}$  based on EDS analysis and charge balance. The C/H/N elemental analysis (Table S1) confirms the chemical composition of the Pi-Co-glycerate hollow nanosphere. The 3.22 wt % carbon and 2.15 wt % hydrogen in the Pi-Co-glycerate hollow nanosphere are consistent with the calculated results (C 4.73 wt % and H 2.11 wt %)



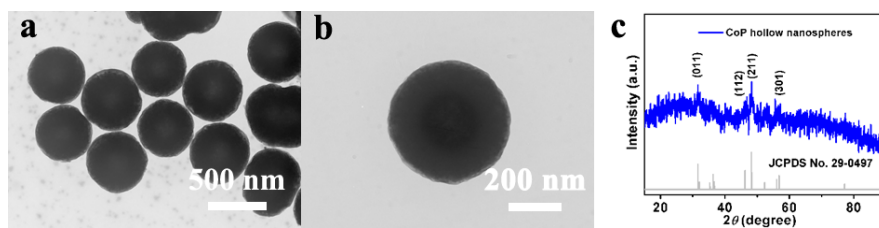

**Fig. S8** TEM images (a and b) and XRD pattern (c) of the CoP hollow nanospheres synthesized using Co-glycerate solid nanospheres as the template and annealed at 400 °C for 1 h with a heating rate of 1 °C min<sup>-1</sup> in Ar atmosphere in a tube furnace device. After phosphorization in a tube furnace device, the CoP hollow nanospheres with thick shell are obtained (Fig. S8a, b), which are different from the Pi-Co-glycerate produced in a teflon autoclave. The diffraction peaks are consistent with the orthorhombic CoP (JCPDS No.29-0497), the weak peak indicates the low crystalline (Fig. S8c).

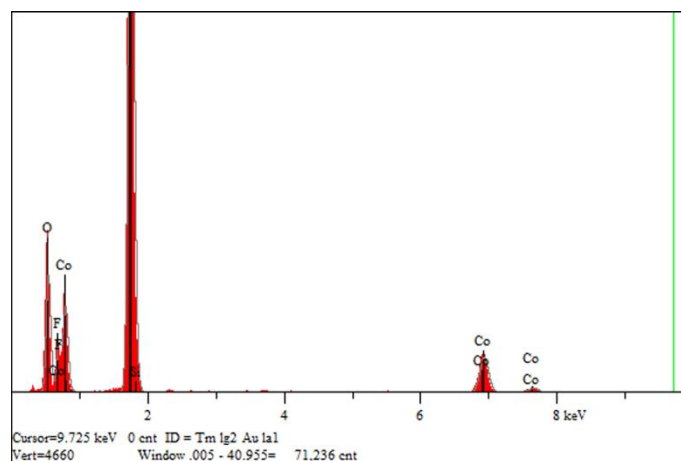

**Fig. S9** EDS image of the hierarchical ultrathin sheet-based CoOOH hollow nanospheres. The molar rate of Co and O is 1 : 1.6.

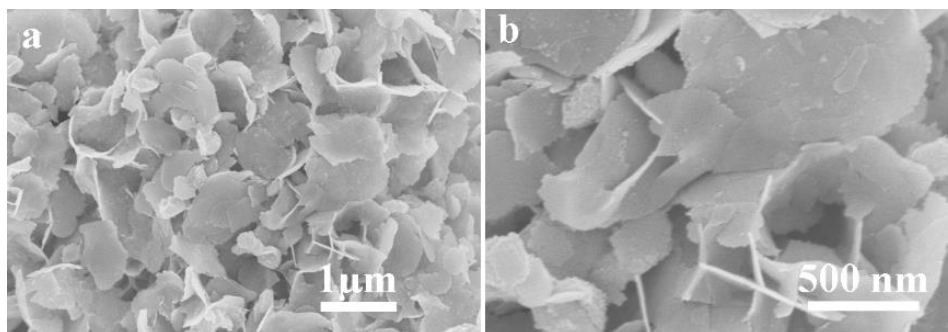

**Fig. S10** SEM images of sample obtained using the template Pi-Co-glycerate hollow nanospheres without Nafion membrane.

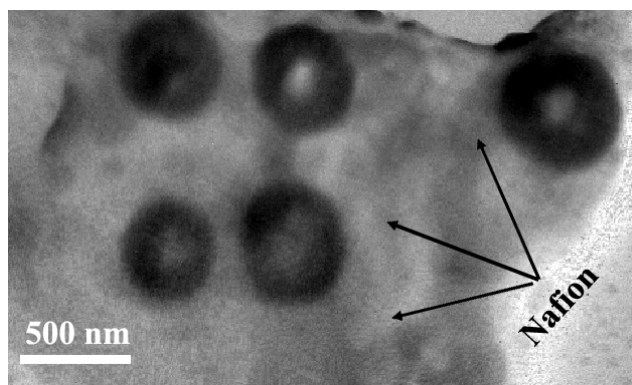

**Fig. S11** TEM images of the products obtained using the Co-glycerate hollow nanospheres as the templates, with other conditions remaining no change.

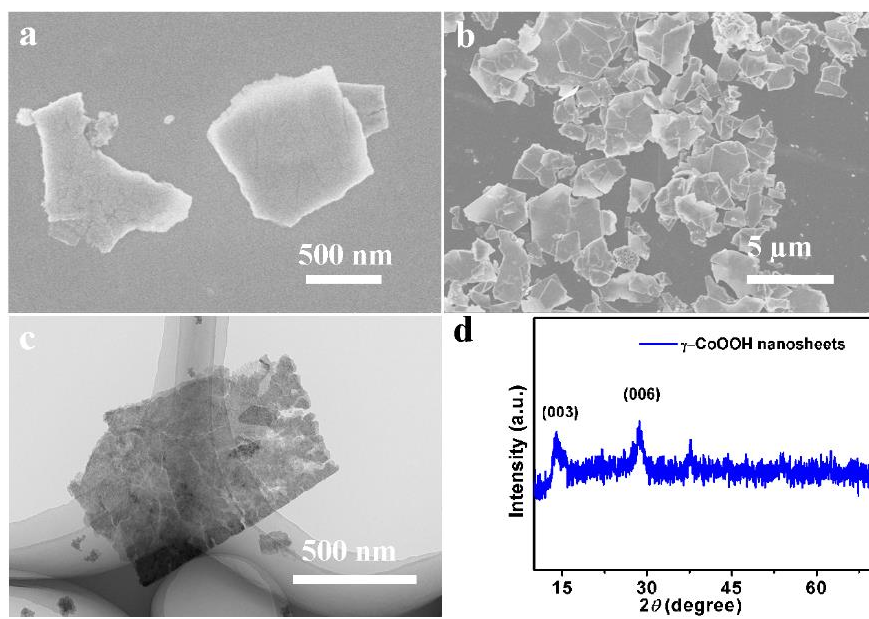

**Fig. S12** SEM (a, b), TEM images (c) and XRD pattern (d) of the  $\gamma$ -CoOOH nanosheets.

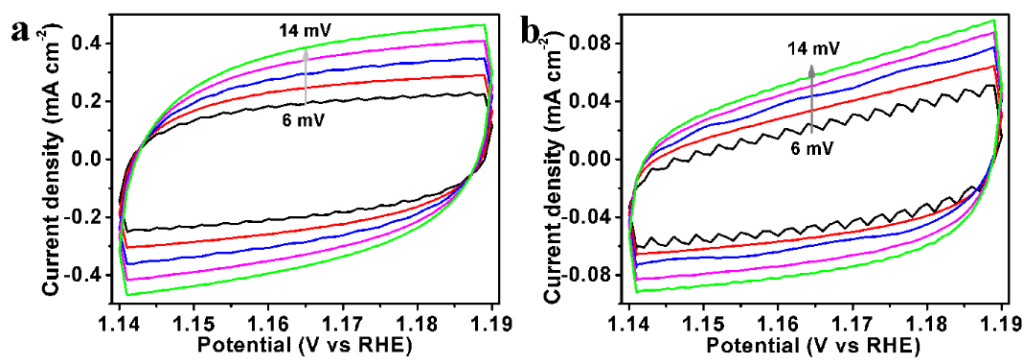

**Fig. S13** CV curves of the hierarchical CoOOH hollow nanospheres (a) and the  $\gamma$ -CoOOH nanosheets (b) at different scan rates.

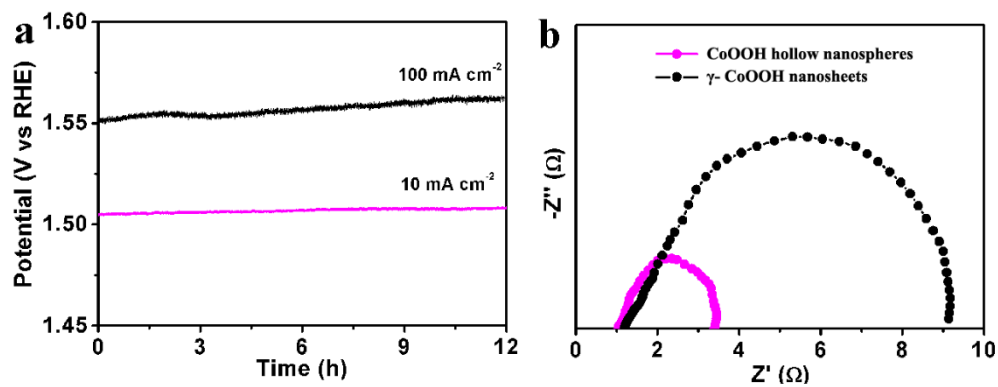

**Fig. S14** (a) OER chronopotentiometric measurements of the hierarchical CoOOH hollow nanospheres at the current density of 10 mA cm<sup>-2</sup> (magenta) and 100 mA cm<sup>-2</sup> (black) for 12 h. (b) Nyquist plots of the hierarchical CoOOH hollow nanospheres (magenta) and the  $\gamma$ -CoOOH nanosheets (black) at 0.6 V vs Hg/HgO.

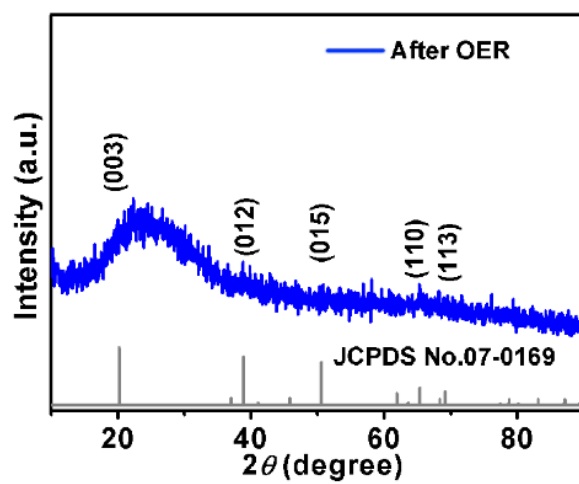

**Fig. S15** XRD pattern of the hierarchical CoOOH hollow nanospheres after OER test.



**Table S1.** C/H/N elemental analysis of the Co-glycerate solid nanosphere, the Co-glycerate hollow nanosphere, and the Pi-Co-glycerate hollow nanosphere.

|       | Co-glycerate solid nanosphere | Co-glycerate hollow nanosphere | Pi-Co-glycerate hollow nanosphere |
|-------|-------------------------------|--------------------------------|-----------------------------------|
| C wt% | 26.04                         | 15.97                          | 4.73                              |
| H wt% | 3.96                          | 3.19                           | 2.11                              |

**Table S2.** Comparison of the electrochemical OER properties of the hierarchical CoOOH hollow nanospheres with those of the reported Co-based nanostructures.

| electrode materials                                      | $\eta@10 \text{ mAcm}^{-2}$ | $\eta@200 \text{ mAcm}^{-2}$ | Tafel Slope             | electrolyte | substrate     | Ref. |
|----------------------------------------------------------|-----------------------------|------------------------------|-------------------------|-------------|---------------|------|
|                                                          | (mV)                        | (mV)                         | (mV dec <sup>-1</sup> ) | KOH         |               |      |
| CoOOH porous nanosheet arrays                            | 330                         | > 370                        | 56.4                    | 1.0 M       | carbon fiber  | 6    |
| Ir-Co(OH) <sub>2</sub> nanosheet                         | 373                         | > 570                        | 70.2                    | 1.0 M       | glassy carbon | 7    |
| Co <sub>3</sub> O <sub>4</sub> -C porous nanowire arrays | 290                         | > 570                        | 70                      | 0.1 M       | Cu foil       | 8    |
| Co(OH) <sub>2</sub> -TCNQ nanowire arrays                |                             | ~ 370                        | 101                     | 1.0 M       | copper foam   | 1    |
| 3D Co(OH)F microspheres                                  | 313                         | > 370                        | 52.8                    | 1.0 M       | glassy carbon | 9    |
| FeCoP ultrathin nanosheet arrays                         |                             | ~ 370                        | 63                      | 1.0 M       | nickel foam   | 10   |
| Co-MOF ultrathin nanosheets                              | 370                         | > 370                        | 103                     | 1.0 M       | nickel foam   | 11   |
| CoSe <sub>2</sub> hollow microsphere                     | 330                         | > 470                        | 79                      | 1.0 M       | glassy carbon | 12   |
| Ni <sub>0.6</sub> Co <sub>1.4</sub> P nanocages          | 300                         | > 570                        | 80                      | 1.0 M       | glassy carbon | 13   |
| NiCo <sub>2</sub> O <sub>4</sub> necklace-like           | 280                         | > 370                        | 63                      | 1.0 M       | nickel foam   | 14   |
| Co <sub>3</sub> O <sub>4</sub> porous nanotubes          | 285                         | > 470                        | 80                      | 1.0 M       | nickel foam   | 15   |
| Co <sub>3</sub> O <sub>4</sub> /Co-Fe oxide DSNBs        | 297                         | > 370                        | 61                      | 1.0 M       | glassy carbon | 16   |
| activated Mn-Co oxyphosphide                             | 320                         | > 370                        | 52                      | 1.0 M       | glassy carbon | 17   |
| this work                                                | 275                         | 340                          | 49                      | 1.0 M       | nickel foam   |      |

## References:

1. D. Wu, Y. C. Wei, X. Ren, X. Q. Ji, Y. W. Liu, X. D. Guo, Z. A. Liu, A. M. Asiri, Q. Wei and X. P. Sun, *Adv. Mater.*, 2018, **30**, 1705366.
2. L. S. Xie, R. Zhang, L. Cui, D. N. Liu, S. Hao, Y. J. Ma, G. Du, A. M. Asiri and X. P. Sun, *Angew. Chem.*, 2017, **56**, 1064-1068.
3. H. Wang, D. Y. Yong, S. C. Chen, S. L. Jiang, X. D. Zhang, W. Shao, Q. Zhang, W. S. Yan, B. C. Pan and Y. Xie, *J. Am. Chem. Soc.*, 2018, **140**, 1760-1766.
4. J. L. Xie, Y. H. Zhou, L. H. Li, J. H. Zhang and J. L. Song, *Dalton T.*, 2017, **46**, 9339-9343.
5. L. F. Shen, L. Yu, H. B. Wu, X. Y. Yu, X. G. Zhang and X. W. Lou, *Nat. Commun.*, 2015, **6**, 6694.
6. S. H. Ye, Z. X. Shi, J. X. Feng, Y. X. Tong and G. R. Li, *Angew. Chem.*, 2018, **57**, 2672-2676.
7. Y. K. Zhang, C. Q. Wu, H. I. Jiang, Y. X. Lin, H. J. Liu, Q. He, S. M. Chen, T. Duan and L. Song, *Adv. Mater.*, 2018, **30**, 1707522.
8. T. Y. Ma, S. Dai, M. Jaroniec and S. Z. Qiao, *J. Am. Chem. Soc.*, 2014, **136**, 13925-13931.
9. S. H. Wan, J. Qi, W. Zhang, W. N. Wang, S. K. Zhang, K. Q. Liu, H. Q. Zheng, J. L. Sun, S. Y. Wang and R. Cao, *Adv. Mater.*, 2017, **29**, 1700286.
10. L. Zhou, M. F. Shao, J. B. Li, S. Jiang, M. Wei and X. Duan, *Nano Energy*, 2017, **41**, 583-590.
11. S. L. Zhao, Y. Wang, J. C. Dong, C. T. He, H. J. Yin, P. F. An, K. Zhao, X. F. Zhang, C. Gao, L. J. Zhang, J. W. Lv, J. X. Wang, J. Q. Zhang, A. M. Khattak, N. A. Khan, Z. X. Wei, J. Zhang, S. Q. Liu, H. J. Zhao and Z. Y. Tang, *Nat. Energy*, 2016, **1**, 16184.
12. X. B. Liu, Y. C. Liu and L. Z. Fan, *J. Mater. Chem. A*, 2017, **5**, 15310-15314.
13. B. C. Qiu, L. J. Cai, Y. Wang, Z. Y. Lin, Y. P. Zuo, M. Y. Wang and Y. Chai, *Adv. Funct. Mater.*, 2018, **28**, 1706008.

14. S. J. Peng, F. Gong, L. L. Li, D. S. Yu, D. Ji, T. X. Zhang, Z. Q. Hu, Z. Zhang, S. L. Chou, T. R. Zhang, Y. R. Du and S. Ramakrishna, *J. Am. Chem. Soc.*, 2018, **140**, 13644-13653.
15. H. Wang, S. F. Zhuo, Y. Liang, X. L. Han and B. Zhang, *Angew. Chem.*, 2016, **55**, 9055-9059.
16. X. Wang, L. Yu, B. Y. Guan, S. Song and X. W. D. Lou, *Adv. Mate.*, 2018, **30**, 1801211.
17. B. Y. Guan, L. Yu and X. W. D. Lou, *Angew. Chem.*, 2017, **56**, 2386-2389.
